# Supplementary material
Source: PubMed Central journal article supplement (PMC2755958)
Supplement: supp_M109.020495_Suppdata.pdf [file supp_M109.020495_Suppdata.pdf]

# Suppl. Fig 1

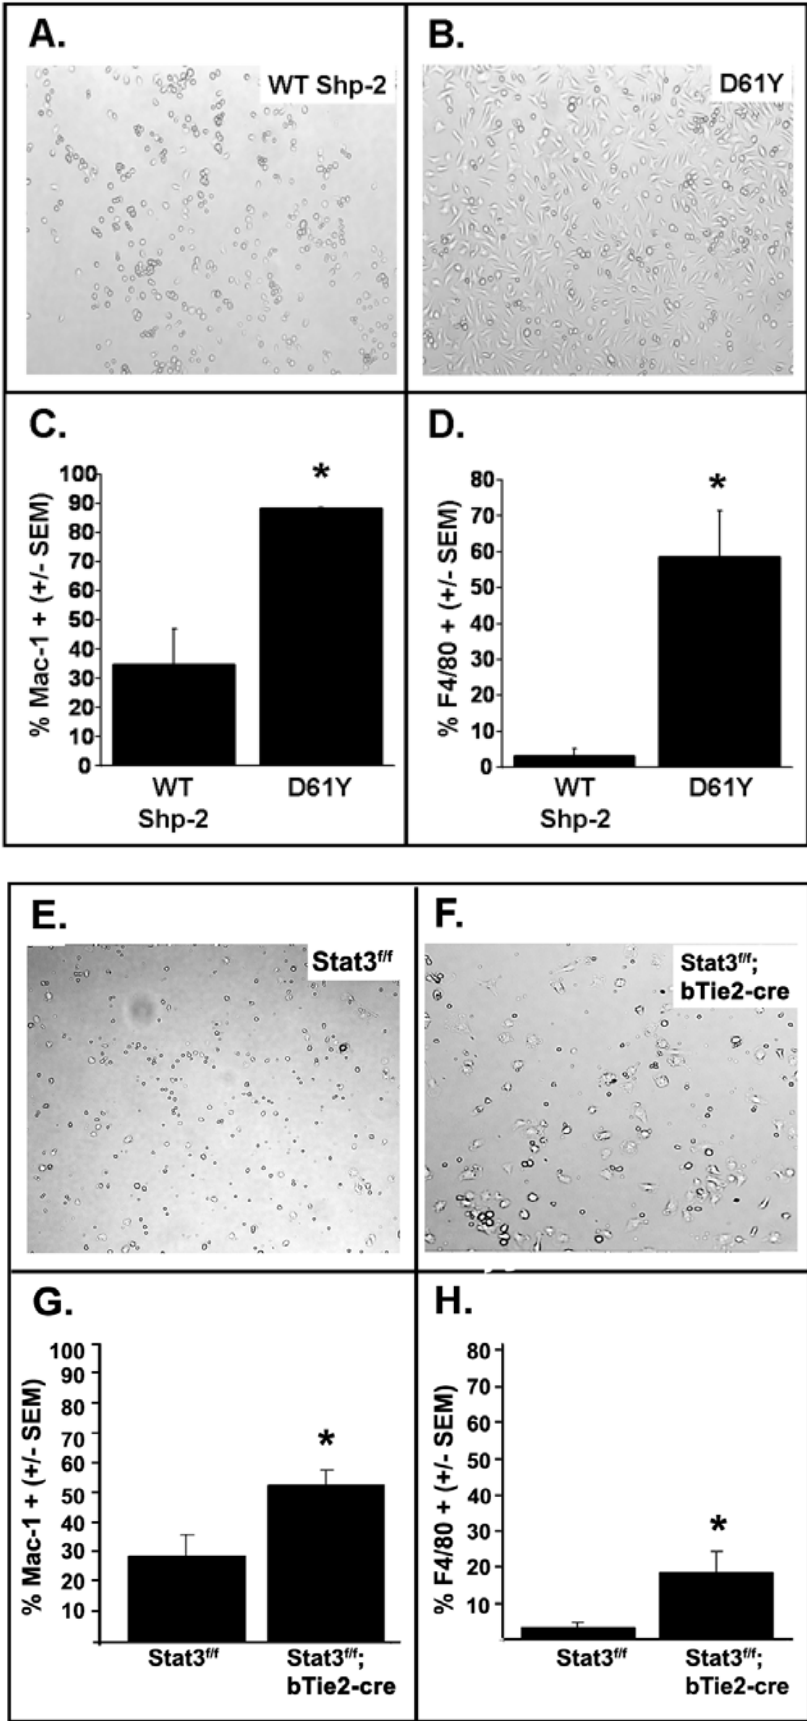

**Supplemental Figure Legend:**

**Supplemental Figure 1.** Cellular morphology following culture of **A**, WT Shp2-expressing, **B**, Shp2D61Y-expressing, **E**, Stat3 wild type (Stat3<sup>fl/fl</sup>), and **F**, Stat3<sup>-/-</sup> (Stat3<sup>fl/fl</sup>; bTie2-cre) lineage negative murine bone marrow cells (isolated using SpinSep protocol, Stem Cell Technologies) in mast cell media (IL-3 10 U/mL) for two weeks; **C** and **G**, showing flow cytometry analysis for Mac-1, comparing WT Shp2 to Shp2D61Y in (**C**) and Stat3 wild type cells and Stat3<sup>-/-</sup> cells in (**G**) ; **D** and **H**, F4/80, comparing WT Shp2 to Shp2D61Y in (**D**) and Stat3 wild type cells and Stat3<sup>-/-</sup> cells in (**H**).
